# Supplementary material
Source: publisher figshare collection journal article supplement (https://asha.figshare.com/articles/dataset/_/13570934)
Supplement: Supplementary file 2 [file 1]

## Supplemental Material S2. Search strategy.

### PubMed

MH AND Teaching OR training OR treatment OR "clinical trial" OR intervention OR therapy OR rehabilitation OR remediation OR "special education" OR "dynamic assessment" OR "response to intervention") AND ("language impairment" OR "language delay" OR "language disorder" OR "language disability" OR "language development disorders" OR dysphasi\* OR aphasi\* OR "developmental communication disorder") AND (child\* OR preschool\* OR adolescen\* OR teenage\* OR youth) NOT (adult OR deaf OR autism\* OR "hearing impairment" OR "Down syndrome" OR "intellectual disability" OR "traumatic brain injury" OR "acquired brain injury" OR "physical disability" OR "learning disability" OR "severe learning difficulties" OR "severe learning difficulty" OR disease) AND (("2006/01/01"[PDat] : "2015/12/31"[PDat]))

### Web of Science

TOPIC: ((teaching OR training OR treatment OR "clinical trial" OR intervention OR therapy OR rehabilitation OR remediation OR "special education" OR "dynamic assessment" OR "response to intervention") AND (language AND (impairment OR delay OR disorder OR disability) OR "language development disorder" OR dysphasi\* OR aphasi\* OR "developmental communication disorder") AND (child\* OR preschool\* OR adolescen\* OR teenage\* OR youth) NOT (adult OR deaf OR autism\* OR "hearing impairment" OR "Down syndrome" OR "intellectual disability" OR "traumatic brain injury" OR "acquired brain injury" OR "physical disability" OR "learning disability" OR "severe learning difficulties" OR disease)) 2006-2015 excluding Chemical abstracts

### ERIC

((teaching OR training OR treatment OR "clinical trial" OR intervention OR therapy OR rehabilitation OR remediation OR "special education" OR "dynamic assessment" OR "response to intervention") AND ("language impairment" OR "language delay" OR "language disorder" OR "language disability" OR "language development disorder" OR dysphasi\* OR aphasi\* OR "developmental communication disorder") AND (child\* OR preschool\* OR adolescen\* OR teenage\* OR youth) NOT (adult OR deaf OR autism\* OR "hearing impairment" OR "Down syndrome" OR "intellectual disability" OR "traumatic brain injury" OR "acquired brain injury" OR "physical disability" OR "learning disability" OR "severe learning difficulties" OR disease))

Setting the year limit on (2006-2015).

### PsycINFO

((teaching OR training OR treatment OR "clinical trial" OR intervention OR therapy OR rehabilitation OR remediation OR "special education" OR "dynamic assessment" OR "response to intervention") AND (language AND (impairment OR delay OR disorder OR disability) OR "language development disorder" OR dysphasi\* OR aphasi\* OR "developmental communication disorder") AND (child\* OR preschool\* OR adolescen\* OR teenage\* OR youth) NOT (adult OR deaf OR autism\* OR "hearing impairment" OR "Down syndrome" OR "intellectual

disability" OR "traumatic brain injury" OR "acquired brain injury" OR "physical disability" OR "learning disability" OR "severe learning difficulties" OR disease))

## Scopus

( TITLE-ABS-KEY ( teaching OR training OR treatment OR "clinical trial" OR intervention OR therapy OR rehabilitation OR remediation OR "special education" OR "dynamic assessment" OR "response to intervention" ) AND TITLE-ABS-KEY ( "language impairment" OR "language delay" OR "language disorder" OR "language disability" OR "language development disorder" OR dysphasi\* OR aphasi\* OR "developmental communication disorder" ) AND TITLE-ABS-KEY ( child\* OR preschool\* OR adolescen\* OR teenage\* OR youth ) AND NOT TITLE-ABS-KEY ( adult OR deaf OR autis\* OR "hearing impairment" OR "Down syndrome" OR "intellectual disability" OR "traumatic brain injury" OR "acquired brain injury" OR "physical disability" OR "learning disability" OR "severe learning difficulties" OR disease ) ) AND SUBJAREA ( mult OR medi OR nurs OR vete OR dent OR heal OR mult OR arts OR busi OR deci OR econ OR psyc OR soci ) AND PUBYEAR > 2005 AND PUBYEAR < 2016 AND ( EXCLUDE ( DOCTYPE , "le" ) )
